# Supplementary material for: A unified platform to manage, share, and archive morphological and functional data in insect neuroscience
Source: eLife journal article supplement (doi:10.7554/elife.65376), 2021-08-24
Supplement: supp [file elife_poa_e65376_Figure_2_figure_supplement_2.pdf › elife_poa_e65376_Figure_2_figure_supplement_2.pdf]

# BRAIN STRUCTURES

## Antennal Lobe

- └ Macrogglomerular complex

## Anterior Optic Tubercle

- └ AOTU lower unit complex
  - └ AOTU lower unit
  - └ AOTU - medial unit
  - └ AOTU nodular unit
  - └ AOTU strap
- └ AOTU upper unit

## Central Complex

- └ Ellipsoid body / Lower division of the central body
- └ Fanshaped body / Upper division of the central body
- └ Nodus
- └ Protocerebral bridge
- └ Posterior optic tubercle

## Gnathal Ganglion

- └ Gnathal Ganglion Rest
- └ Subesophageal Glomeruli

## Inferior Neuropils

- └ Anterior lip
- └ Antler
- └ Clamp
  - └ Inferior clamp
  - └ Superior clamp
- └ Crepine
- └ Inferior bridge

## Lateral Complex

- └ Bulb
  - └ Dorsal bulb
  - └ Lateral bulb
  - └ Medial bulb
  - └ Ventral bulb
- └ Gall
- └ Lateral accessory lobe
  - └ Lower lateral accessory lobe
  - └ Upper lateral accessory lobe

## Lateral Horn

## Mushroom Body

- └ Accessory calyx
- └ Calyx
  - └ Calyx basal zone
  - └ Lateral calyx basal ring
  - └ Lateral calyx collar
  - └ Lateral calyx inner zone
  - └ Lateral calyx lip
  - └ Lateral calyx outer zone
  - └ Medial calyx basal ring
  - └ Medial calyx collar
  - └ Medial calyx inner zone
  - └ Medial calyx lip
  - └ Medial calyx outer zone
- └ Medial gamma lobe
- └ Medial lobe
- └ Pedunculus
- └ Spur
- └ Vertical gamma lobe
- └ Vertical lobe
- └ Y-lobes
  - └ Dorsal lobelet
  - └ Ventral lobelet
- └ Y-tract

## Ocellar Neuropils

## Optic Lobe

- └ Accessory medulla
- └ Dorsal rim medulla
- └ Lamina
  - └ Accessory lamina
  - └ Dorsal lamina
  - └ Ventral lamina
- └ Lobula complex
  - └ Anterior lobula
  - └ Dorsal lobula
  - └ Inner lobula
  - └ Lobula
  - └ Lobula plate
  - └ Outer lobula
- └ Medulla
  - └ Inner medulla
  - └ Outer medulla

## Periesophageal Neuropils

- └ Antennal mechanosensory and motor center
- └ Periesophageal neuropils rest

## Superior Neuropils

- └ Superior intermediate protocerebrum
- └ Superior lateral protocerebrum
- └ Superior medial protocerebrum
  - └ Dorsal shell of SMP
  - └ Ventral shell of SMP

## Ventral Cord

## Ventrolateral Neuropils

- └ Optic glomerular complex
- └ Posterior lateral protocerebrum
- └ Ventrolateral protocerebrum

## Ventromedial Neuropils

- └ Epaulette
- └ Gorget
- └ Posterior slope
- └ Vest
- └ Ventral complex
