# Supplementary figures and images for: A unified platform to manage, share, and archive morphological and functional data in insect neuroscience
Source: eLife journal article supplement (doi:10.7554/elife.65376), 2021-08-24

**Data Management**  
**User Authentication**  
**User Interaction**

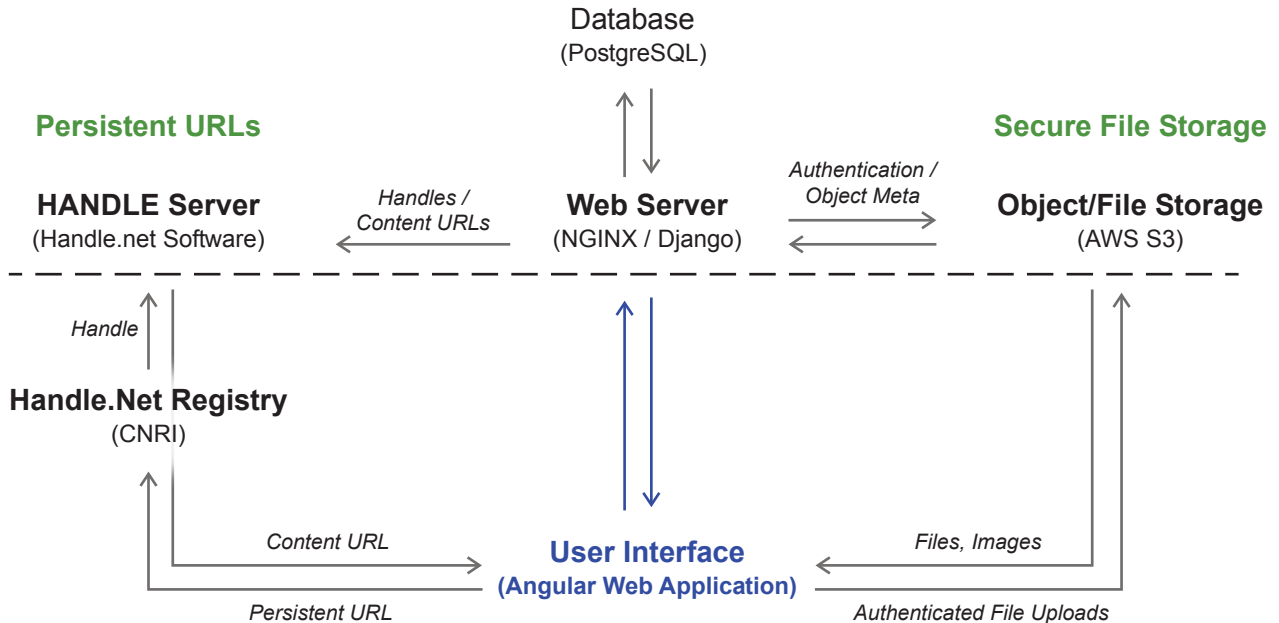

Supplement: supp [file elife_poa_e65376_Figure_1_figure_supplement_1.pdf › elife_poa_e65376_Figure_1_figure_supplement_1.pdf]

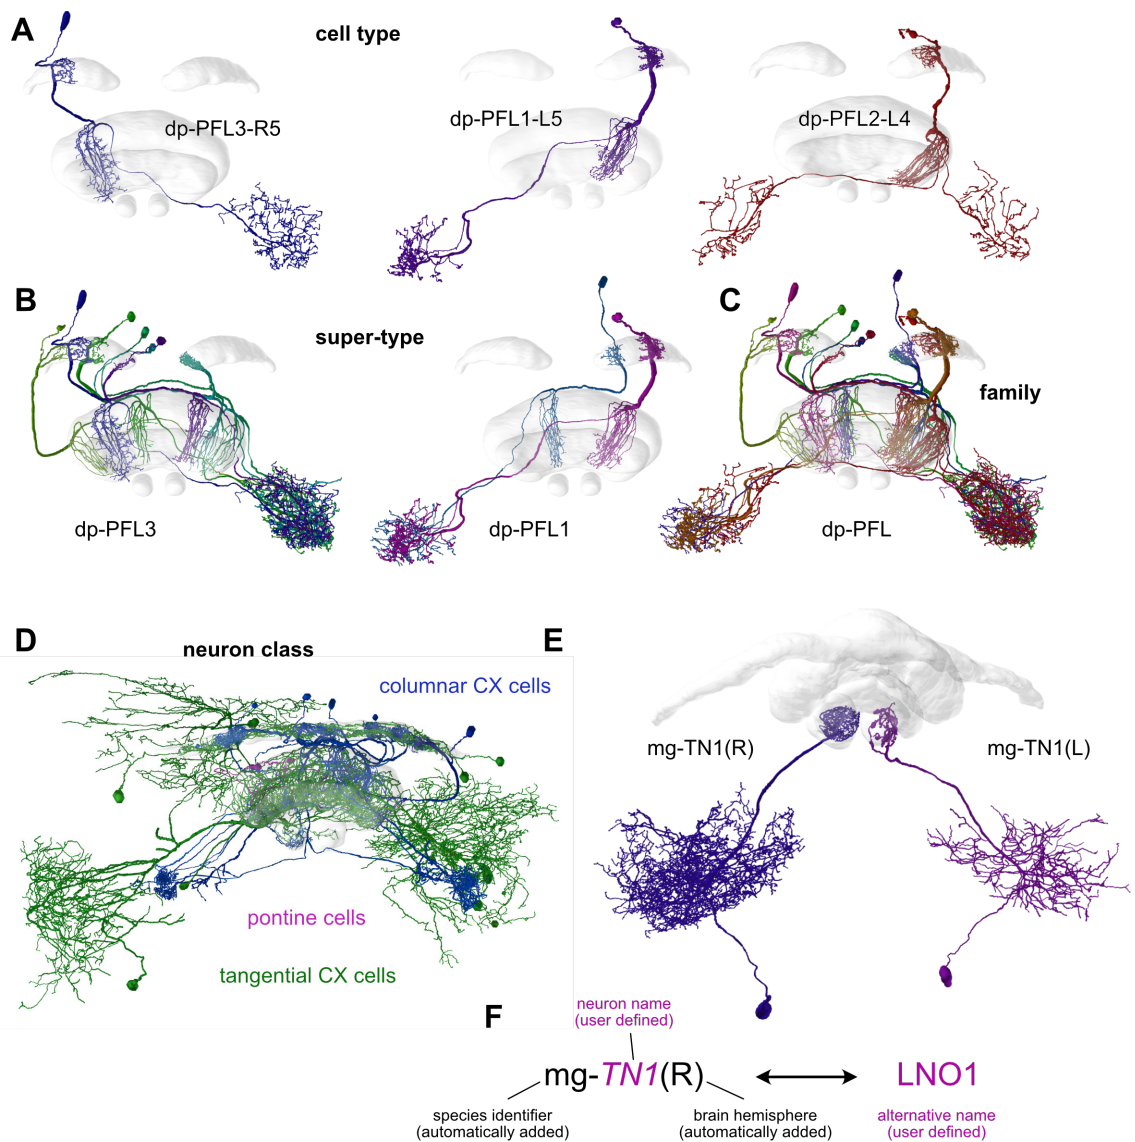

Supplement: supp [file elife_poa_e65376_Figure_1_figure_supplement_2.pdf › elife_poa_e65376_Figure_1_figure_supplement_2.pdf]

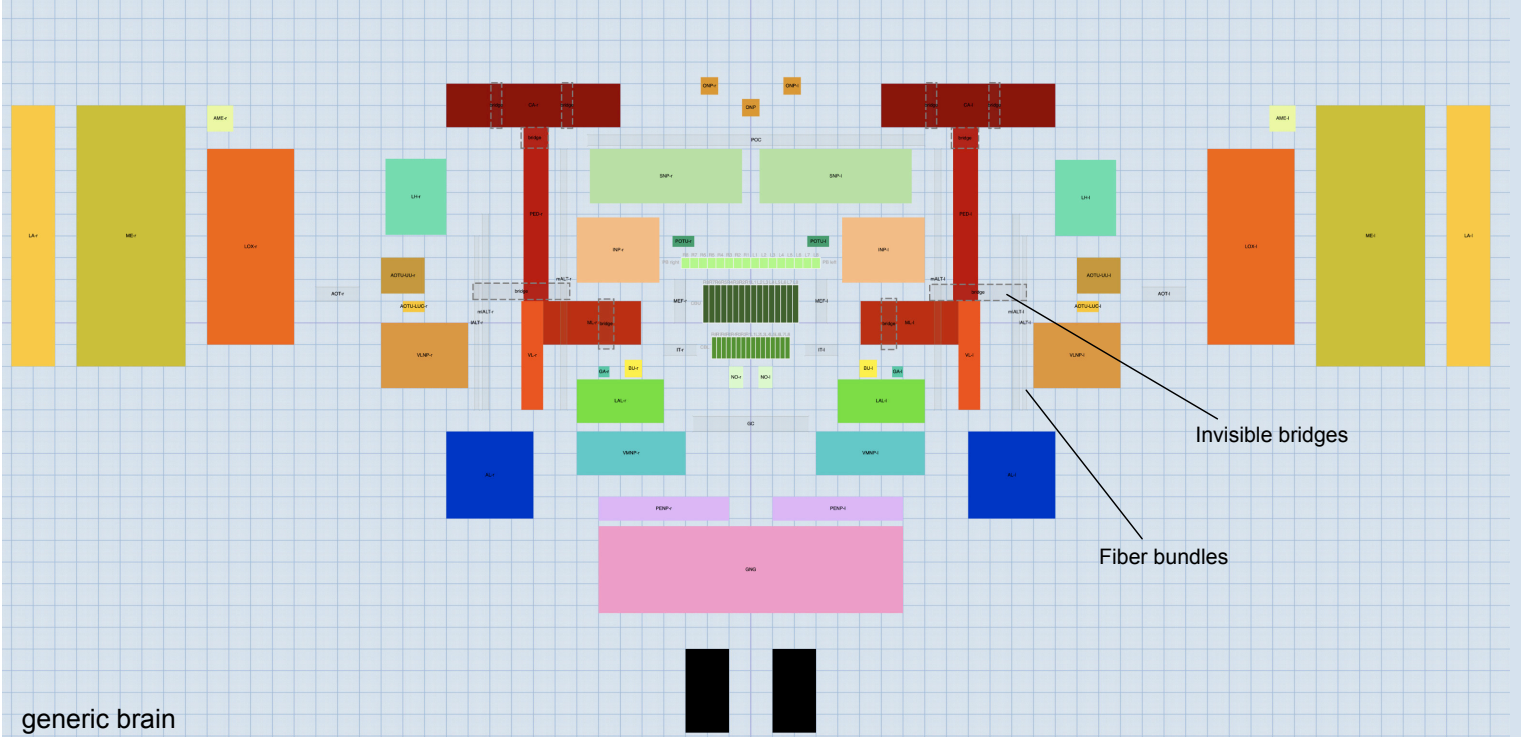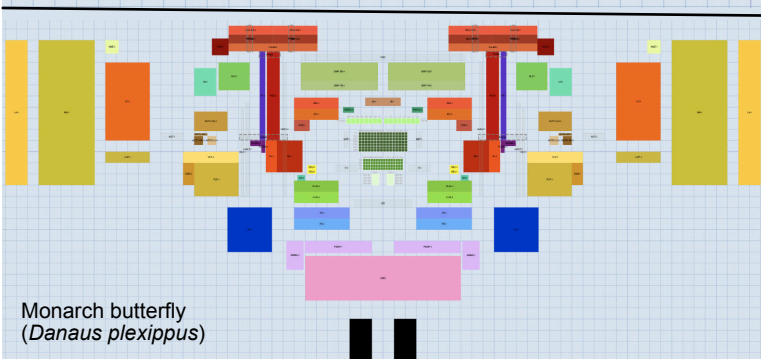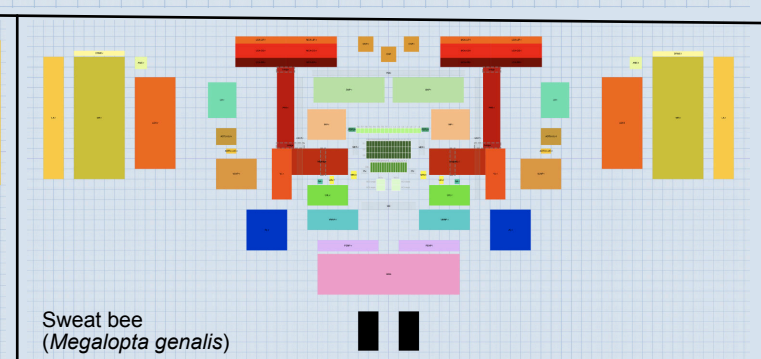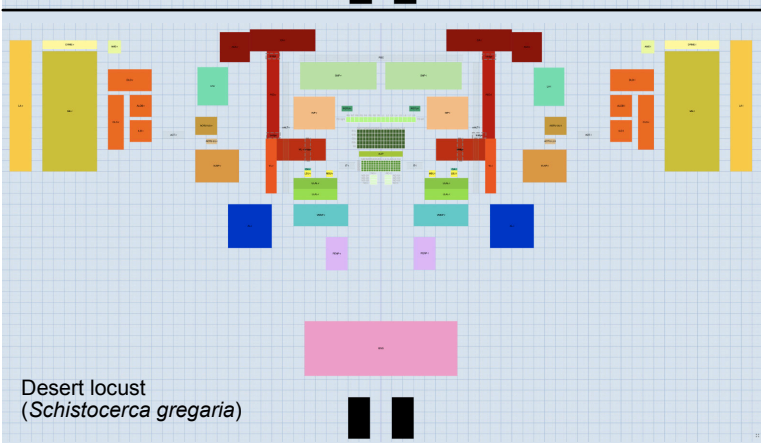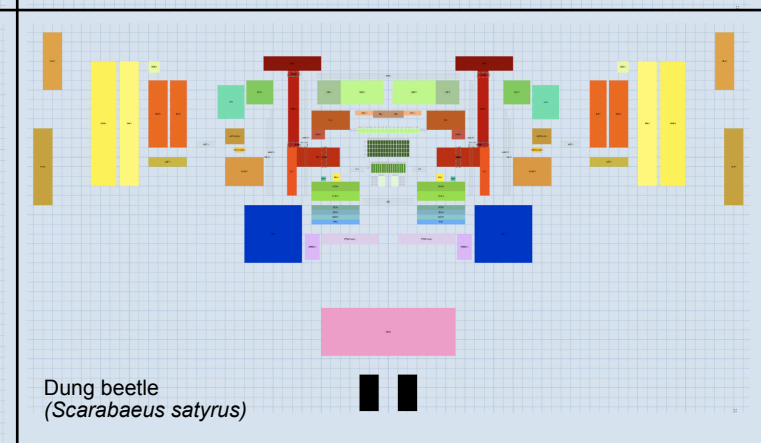

Supplement: supp [file elife_poa_e65376_Figure_2_figure_supplement_1.pdf › elife_poa_e65376_Figure_2_figure_supplement_1.pdf]

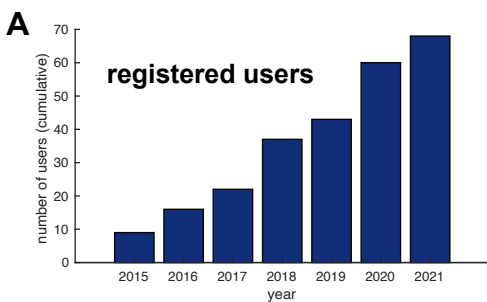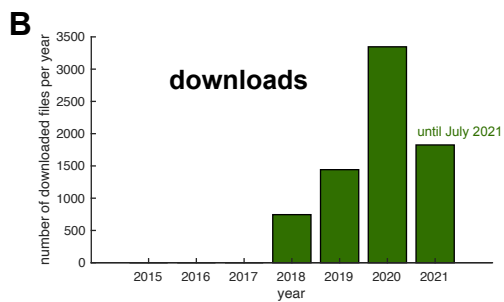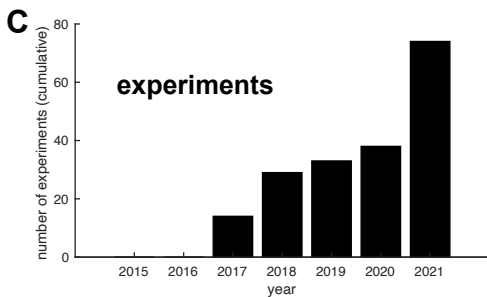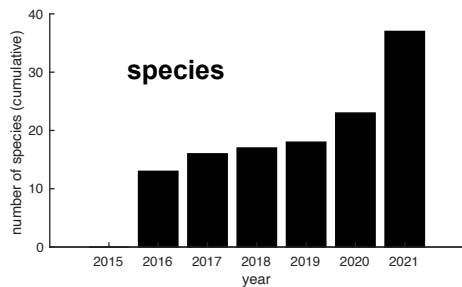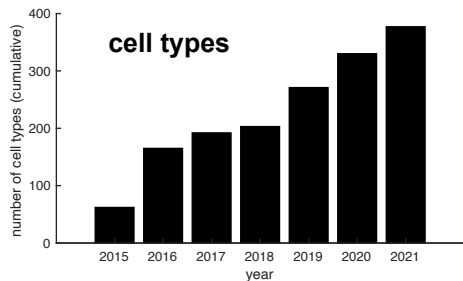

Supplement: supp [file elife_poa_e65376_Figure_7_figure_supplement_1.pdf › elife_poa_e65376_Figure_7_figure_supplement_1.pdf]
